# Supplementary material for: Key epigenetic and signaling factors in the formation and maintenance of the blood-brain barrier
Source: eLife journal article supplement (doi:10.7554/elife.86978), 2023-06-06

Figure 2 figure supplement 2B, E, Source Data . Original membranes corresponding to Figure Figure 2 figure supplement 2B, Rainbow molecular weight markers were employed. All treatment conditions are blotted in single gel. Blots probed for b-actin,HDAC2 and EZH2 are shown respectively.

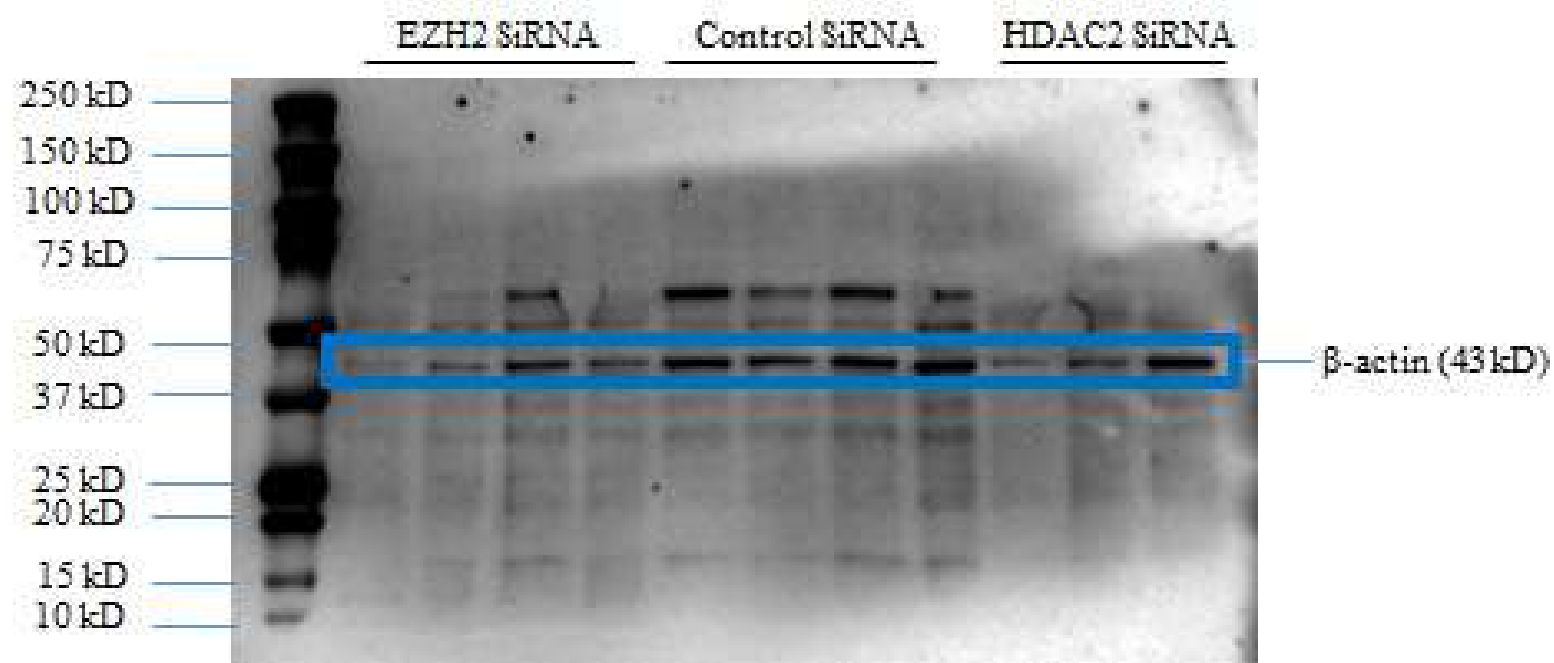

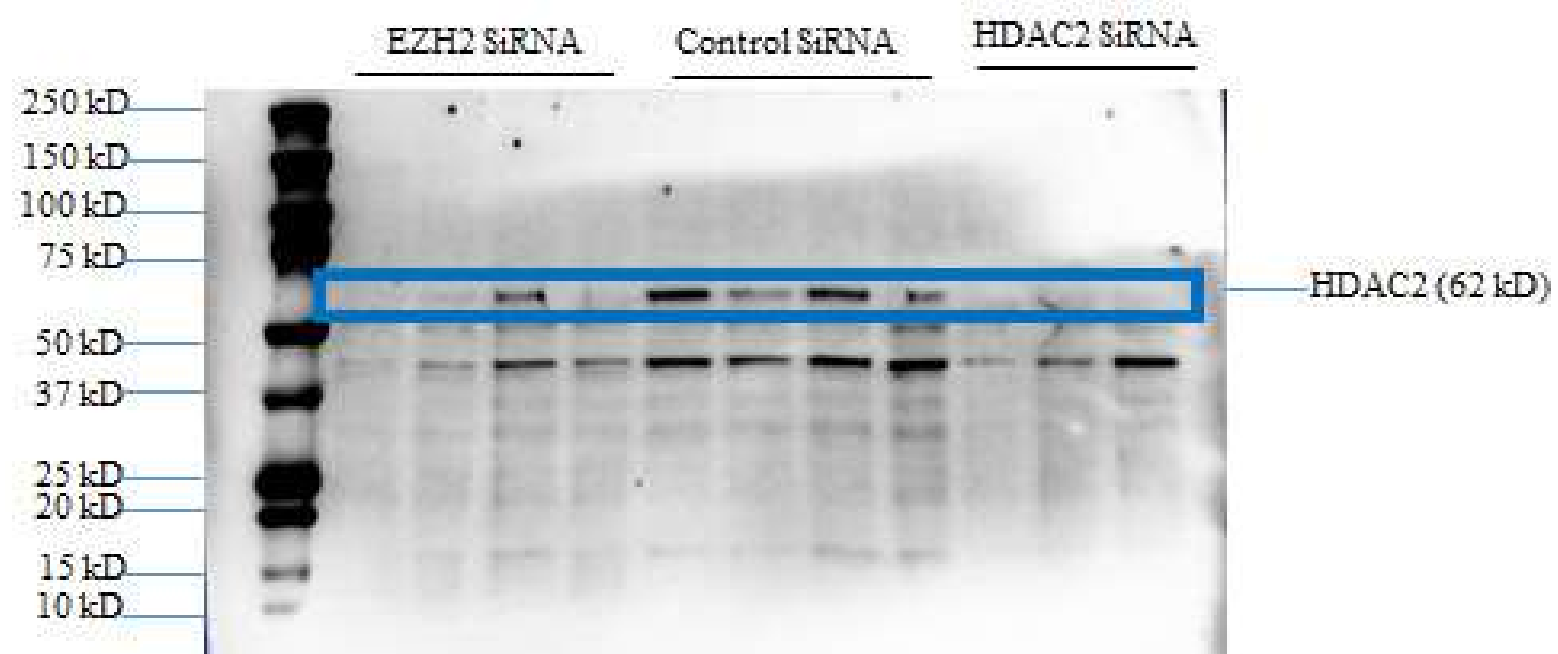

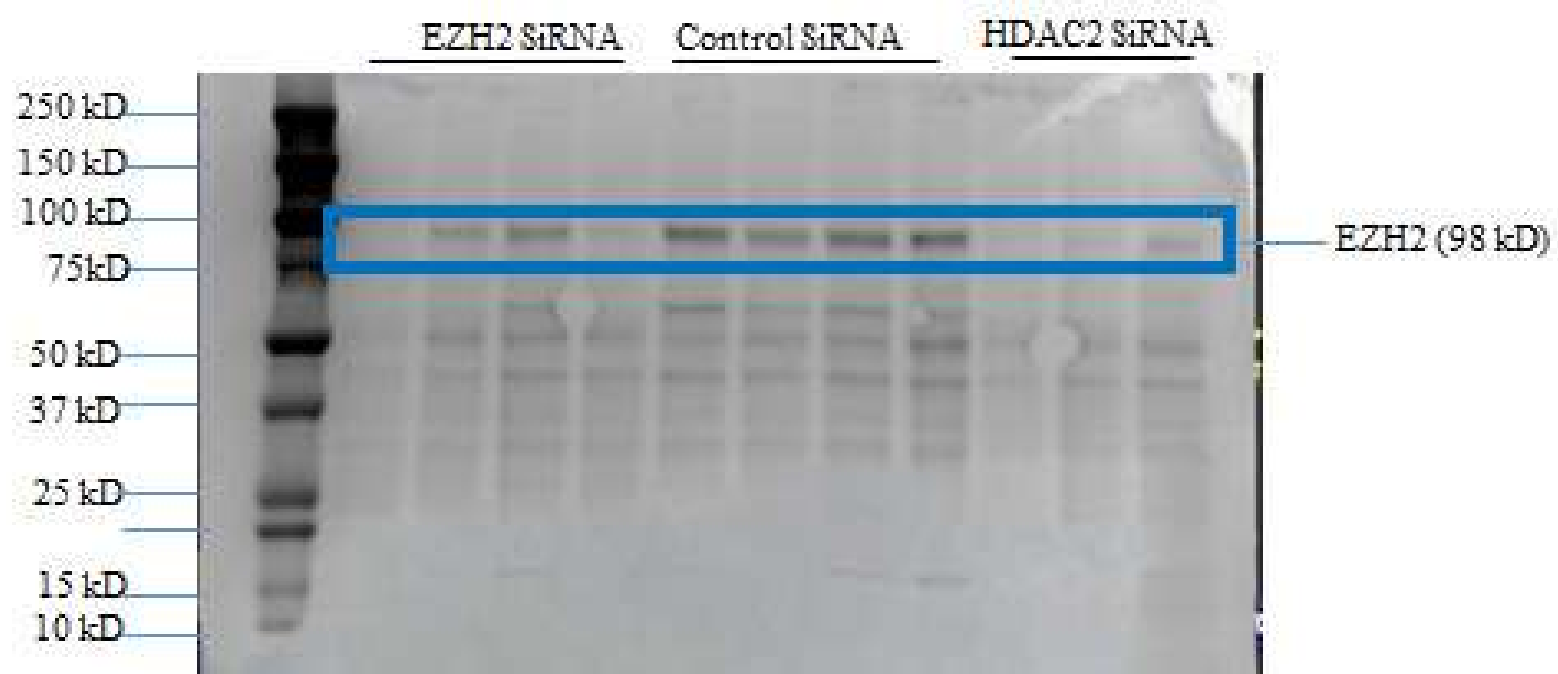

Supplement: fig2-figsupp1-data2 [file elife-86978-fig2-figsupp1-data2-v1.zip]
